# Supplementary material for: Hippocampal subfield alterations in schizophrenia and major depressive disorder: a systematic review and network meta-analysis of anatomic MRI studies
Source: PubMed Central journal article supplement — J Psychiatry Neurosci. 2023 Feb 7;48(1):E34–49. doi: 10.1503/jpn.220086 (PMC9911126; doi:10.1503/jpn.220086), 2023-02-07
Supplement: JPN-220086-at-1.pdf [file JPN-220086-at-1.pdf]

## SUPPLEMENTARY MATERIALS

### CONTENTS

#### Supplementary methods

1. Search strategy
2. Examples of inconsistencies in the study selection
3. Study quality assessment
4. Mathematical formula for subgroup data merging
5. Direct cross-sectional comparisons between the SCZ and MDD

#### Supplementary results

Table S1. PRISMA NMA checklist of items to include when reporting a systematic review involving a network meta-analysis

Table S2. Newcastle–Ottawa quality assessment of individual studies

Table S3. Direct volume comparisons between SCZ patients and HC (for 7 studies that reported ICV)

Table S4. Direct volume comparisons between MDD patients and HC (for 7 studies that reported ICV)

Table S5. Indirect volume comparisons between SCZ and MDD patients (for 7 studies that reported ICV)

Table S6. Direct cross-sectional volume comparisons between SCZ and MDD

patients (for 7 studies that reported ICV)

Table S7. Univariate meta-regression to identify potential sources of

heterogeneity in direct volume comparisons between SCZ patients and HC and between MDD patients and HC

Table S8. Egger's linear regression test

Fig. S1. Preferred Reporting Items for Systematic Reviews and Meta-Analyses (PRISMA) flowchart

Fig. S2-1. Forest plots for the whole hippocampus

Fig. S2-2. Forest plots for the CA1

Fig. S2-3. Forest plots for the CA3

Fig. S2-4. Forest plots for the CA4

Fig. S2-5. Forest plots for the GC/DG

Fig. S2-6. Forest plots for the subiculum

Fig. S2-7. Forest plots for the presubiculum

Fig. S2-8. Forest plots for the molecular layer

Fig. S2-9. Forest plots for the hippocampal tail

Fig. S2-10. Forest plots for the fimbria

Fig. S2-11. Forest plots for the hippocampal fissure

Fig. S2-12. Forest plot for the left HATA

Fig. S3. Meta-regression graph: the moderating effect of age at onset, age at study, illness duration and PANSS on the effect size (MD) of left hippocampal

Appendix 1 to Sun Y, Hu N, Wang M, et al. Hippocampal subfield alterations in schizophrenia and major depressive disorder: a systematic review and network meta-analysis of anatomic MRI studies. *J Psychiatry Neurosci* 2023. doi: 10.1503/jpn.220086. Copyright © 2023 The Author(s) or their employer(s). To receive this resource in an accessible format, please contact us at [cmajgroup@cmaj.ca](mailto:cmajgroup@cmaj.ca). Online appendices are unedited and posted as supplied by the authors.

tail volume reduction in SCZ versus HC

## **Supplementary Methods**

### **1. Search strategy**

We used the following keywords to search for hippocampal subfield volume studies of patients with schizophrenia: (1) hippocampal subfields, hippocampal subfield, hippocampal subregions, hippocampal subregion, cornu ammonis, CA, CA1, CA2, CA23, CA2/3, CA2-3, CA3, CA4, dentate gyrus, DG, DGL, DG/CA4 and subiculum; (2) magnetic resonance imaging, MRI and volume; (3) schizophrenia, schizophrenias, schizophrenic disorder, schizophrenic disorders, SCZ and psychosis. Similarly, the following keywords were used for hippocampal subfield volume studies of patients with major depressive disorder: (1) hippocampal subfields, hippocampal subfield, hippocampal subregions, hippocampal subregion, cornu ammonis, CA, CA1, CA2, CA23, CA2/3, CA2-3, CA3, CA4, dentate gyrus, DG, DGL, DG/CA4 and subiculum; (2) magnetic resonance imaging, MRI and volume; (3) major depressive disorder, major depressive disorders, major depression, unipolar depression, and MDD. In the above search, keywords (1), (2) and (3) were both combined with “AND” in PubMed and Embase.

### **2. Examples of inconsistencies in the study selection**

(1) Some original studies included patients with psychosis, some of whom were patients with schizophrenia<sup>1,2</sup>. The two authors initially disagreed on whether to include these

studies. After a joint discussion, the authors decided to exclude these studies on the basis of precision.

(2) Three studies<sup>3-5</sup> that harnessed FreeSurfer v5.3 were initially excluded by one reviewer, but were included by another reviewer. After finding this inconsistency, the three articles were read again and discussed by two reviewers. They were eventually included in the network meta-analysis because they used the the atlas of Iglesias et al<sup>6</sup> which is the same as FreeSurfer v6.0.

### 3. Study quality assessment

Based on the recommendation of the Cochrane Handbook (<https://training.cochrane.org/handbook>), we employed the Newcastle–Ottawa Scale ([http://www.ohri.ca/programs/clinical\\_epidemiology/oxford.asp](http://www.ohri.ca/programs/clinical_epidemiology/oxford.asp)) to assess the quality of the eligible studies. This scale was used to assess the risk of bias of individual studies based on three fundamental features: study selection (0–4 points), comparability (0–2 points), and exposure (0–3 points). A total score of 7–9 points is considered high quality.

### 4. Mathematical formula for combing groups according to the cochrane handbook

$$M = (N_1M_1 + N_2M_2)/(N_1 + N_2)$$

$$SD = \sqrt{\frac{(N_1 - 1)SD_1^2 + (N_2 - 1)SD_2^2 + \frac{N_1N_2}{N_1 + N_2}(M_1^2 + M_2^2 - 2M_1M_2)}{N_1 + N_2 - 1}}$$

## **5. Direct cross-sectional comparisons between the SCZ and MDD (for 7 studies that reported ICV)**

For individual study, the ICV-corrected volume of each hippocampal subfield was defined as absolute volume / mean of ICV. ICV is measured in liters. The mean of the ICV-corrected volume is mean volume / Mean of ICV and the SD of the ICV-corrected volume is mean SD / Mean of ICV. According to the following formula (see Supplementary Methods, point 4), the ICV-corrected volume (mean  $\pm$  SD) of the same hippocampal subfield from multiple studies were pooled. When there are more than two groups to combine, the strategy is to apply the above formula sequentially. The Z test was used for volumetric comparisons. The false discovery rate method was used for multiple comparisons. We analysed 10 hippocampal subfields and the whole hippocampus for each hemisphere, and the number of tests for each analysis was 11.

## Supplementary Results

**Table S1.** PRISMA NMA checklist of items to include when reporting a systematic review involving a network meta-analysis

| Section/Topic       | Item # | Checklist Item                                                                                                                                                                                                                                                                                                                                                                                                                                                                                                                                                                                                                                                                                                                                                                          | Reported on Page # |
|---------------------|--------|-----------------------------------------------------------------------------------------------------------------------------------------------------------------------------------------------------------------------------------------------------------------------------------------------------------------------------------------------------------------------------------------------------------------------------------------------------------------------------------------------------------------------------------------------------------------------------------------------------------------------------------------------------------------------------------------------------------------------------------------------------------------------------------------|--------------------|
| <b>TITLE</b>        |        |                                                                                                                                                                                                                                                                                                                                                                                                                                                                                                                                                                                                                                                                                                                                                                                         |                    |
| Title               | 1      | Identify the report as a systematic review <i>incorporating a network meta-analysis (or related form of meta-analysis)</i> .                                                                                                                                                                                                                                                                                                                                                                                                                                                                                                                                                                                                                                                            | p. 1               |
| <b>ABSTRACT</b>     |        |                                                                                                                                                                                                                                                                                                                                                                                                                                                                                                                                                                                                                                                                                                                                                                                         |                    |
| Structured summary  | 2      | Provide a structured summary including, as applicable:<br><b>Background:</b> main objectives<br><b>Methods:</b> data sources; study eligibility criteria, participants, and interventions; study appraisal; and <i>synthesis methods, such as network meta-analysis</i> .<br><b>Results:</b> number of studies and participants identified; summary estimates with corresponding confidence/credible intervals; <i>treatment rankings may also be discussed. Authors may choose to summarize pairwise comparisons against a chosen treatment included in their analyses for brevity.</i><br><b>Discussion/Conclusions:</b> limitations; conclusions and implications of findings.<br><b>Other:</b> primary source of funding; systematic review registration number with registry name. | p. 3-4             |
| <b>INTRODUCTION</b> |        |                                                                                                                                                                                                                                                                                                                                                                                                                                                                                                                                                                                                                                                                                                                                                                                         |                    |
| Rationale           | 3      | Describe the rationale for the review in the context of what is already known, <i>including mention of why a network meta-analysis has been conducted.</i>                                                                                                                                                                                                                                                                                                                                                                                                                                                                                                                                                                                                                              | p. 6               |

|            |   |                                                                                                                                                             |      |
|------------|---|-------------------------------------------------------------------------------------------------------------------------------------------------------------|------|
| Objectives | 4 | Provide an explicit statement of questions being addressed, with reference to participants, interventions, comparisons, outcomes, and study design (PICOS). | p. 6 |
|------------|---|-------------------------------------------------------------------------------------------------------------------------------------------------------------|------|

## METHODS

|                                |           |                                                                                                                                                                                                                                                                                                                                                                                   |                                 |
|--------------------------------|-----------|-----------------------------------------------------------------------------------------------------------------------------------------------------------------------------------------------------------------------------------------------------------------------------------------------------------------------------------------------------------------------------------|---------------------------------|
| Protocol and registration      | 5         | Indicate whether a review protocol exists and if and where it can be accessed (e.g., Web address); and, if available, provide registration information, including registration number.                                                                                                                                                                                            | p. 7                            |
| Eligibility criteria           | 6         | Specify study characteristics (e.g., PICOS, length of follow-up) and report characteristics (e.g., years considered, language, publication status) used as criteria for eligibility, giving rationale. <i>Clearly describe eligible treatments included in the treatment network, and note whether any have been clustered or merged into the same node (with justification).</i> | p. 7-8                          |
| Information sources            | 7         | Describe all information sources (e.g., databases with dates of coverage, contact with study authors to identify additional studies) in the search and date last searched.                                                                                                                                                                                                        | p. 7                            |
| Search                         | 8         | Present full electronic search strategy for at least one database, including any limits used, such that it could be repeated.                                                                                                                                                                                                                                                     | Supplementary Materials<br>p. 3 |
| Study selection                | 9         | State the process for selecting studies (i.e., screening, eligibility, included in systematic review, and, if applicable, included in the meta-analysis).                                                                                                                                                                                                                         | p. 8                            |
| Data collection process        | 10        | Describe method of data extraction from reports (e.g., piloted forms, independently, in duplicate) and any processes for obtaining and confirming data from investigators.                                                                                                                                                                                                        | p. 8-9                          |
| Data items                     | 11        | List and define all variables for which data were sought (e.g., PICOS, funding sources) and any assumptions and simplifications made.                                                                                                                                                                                                                                             | p. 8-9                          |
| <b>Geometry of the network</b> | <b>S1</b> | Describe methods used to explore the geometry of the treatment network under study and potential biases related to it. This should include how the evidence base has been graphically summarized for presentation, and what characteristics were compiled and used to describe the evidence base to readers.                                                                      | <i>p. 9-10</i>                  |



|                                        |           |                                                                                                                                                                                                                                                                                                                                                                                                                                                   |              |
|----------------------------------------|-----------|---------------------------------------------------------------------------------------------------------------------------------------------------------------------------------------------------------------------------------------------------------------------------------------------------------------------------------------------------------------------------------------------------------------------------------------------------|--------------|
| Risk of bias within individual studies | 12        | Describe methods used for assessing risk of bias of individual studies (including specification of whether this was done at the study or outcome level), and how this information is to be used in any data synthesis.                                                                                                                                                                                                                            | p. 8         |
| Summary measures                       | 13        | State the principal summary measures (e.g., risk ratio, difference in means). <i>Also describe the use of additional summary measures assessed, such as treatment rankings and surface under the cumulative ranking curve (SUCRA) values, as well as modified approaches used to present summary findings from meta-analyses.</i>                                                                                                                 | p. 8-9       |
| Planned methods of analysis            | 14        | Describe the methods of handling data and combining results of studies for each network meta-analysis. This should include, but not be limited to: <ul style="list-style-type: none"> <li>• <i>Handling of multi-arm trials;</i></li> <li>• <i>Selection of variance structure;</i></li> <li>• <i>Selection of prior distributions in Bayesian analyses; and</i></li> <li>• <i>Assessment of model fit.</i></li> </ul>                            | p. 9-10      |
| <b>Assessment of Inconsistency</b>     | <b>S2</b> | Describe the statistical methods used to evaluate the agreement of direct and indirect evidence in the treatment network(s) studied. Describe efforts taken to address its presence when found.                                                                                                                                                                                                                                                   | NA           |
| Risk of bias across studies            | 15        | Specify any assessment of risk of bias that may affect the cumulative evidence (e.g., publication bias, selective reporting within studies).                                                                                                                                                                                                                                                                                                      | <b>p. 11</b> |
| Additional analyses                    | 16        | Describe methods of additional analyses if done, indicating which were pre-specified. This may include, but not be limited to, the following: <ul style="list-style-type: none"> <li>• Sensitivity or subgroup analyses;</li> <li>• Meta-regression analyses;</li> <li>• <i>Alternative formulations of the treatment network; and</i></li> <li>• <i>Use of alternative prior distributions for Bayesian analyses (if applicable).</i></li> </ul> | <i>p. 10</i> |

**RESULTS<sup>†</sup>**

|                                          |           |                                                                                                                                                                                                                                                                                                                                                                                                                                                              |                              |
|------------------------------------------|-----------|--------------------------------------------------------------------------------------------------------------------------------------------------------------------------------------------------------------------------------------------------------------------------------------------------------------------------------------------------------------------------------------------------------------------------------------------------------------|------------------------------|
| Study selection                          | 17        | Give numbers of studies screened, assessed for eligibility, and included in the review, with reasons for exclusions at each stage, ideally with a flow diagram.                                                                                                                                                                                                                                                                                              | p. 11-12                     |
| <b>Presentation of network structure</b> | <b>S3</b> | Provide a network graph of the included studies to enable visualization of the geometry of the treatment network.                                                                                                                                                                                                                                                                                                                                            | <i>None</i>                  |
| <b>Summary of network geometry</b>       | <b>S4</b> | Provide a brief overview of characteristics of the treatment network. This may include commentary on the abundance of trials and randomized patients for the different interventions and pairwise comparisons in the network, gaps of evidence in the treatment network, and potential biases reflected by the network structure.                                                                                                                            | <i>p. 14</i>                 |
| Study characteristics                    | 18        | For each study, present characteristics for which data were extracted (e.g., study size, PICOS, follow-up period) and provide the citations.                                                                                                                                                                                                                                                                                                                 | Table 1 and Table 2          |
| Risk of bias within studies              | 19        | Present data on risk of bias of each study and, if available, any outcome level assessment.                                                                                                                                                                                                                                                                                                                                                                  | Table S2                     |
| Results of individual studies            | 20        | For all outcomes considered (benefits or harms), present, for each study: 1) simple summary data for each intervention group, and 2) effect estimates and confidence intervals. <i>Modified approaches may be needed to deal with information from larger networks.</i>                                                                                                                                                                                      | Table 3, Table 4 and Table 5 |
| Synthesis of results                     | 21        | Present results of each meta-analysis done, including confidence/credible intervals. <i>In larger networks, authors may focus on comparisons versus a particular comparator (e.g. placebo or standard care), with full findings presented in an appendix. League tables and forest plots may be considered to summarize pairwise comparisons.</i> If additional summary measures were explored (such as treatment rankings), these should also be presented. | p. 14-15                     |
| <b>Exploration for inconsistency</b>     | <b>S5</b> | Describe results from investigations of inconsistency. This may include such information as measures of model fit to compare consistency and inconsistency models, <i>P</i> values from statistical tests, or summary of inconsistency estimates from different parts of the treatment network.                                                                                                                                                              | <i>NA</i>                    |
| Risk of bias across studies              | 22        | Present results of any assessment of risk of bias across studies for the evidence base being studied.                                                                                                                                                                                                                                                                                                                                                        | Table S8                     |

|                                |    |                                                                                                                                                                                                                                                                                                                                                                                                                                |                 |
|--------------------------------|----|--------------------------------------------------------------------------------------------------------------------------------------------------------------------------------------------------------------------------------------------------------------------------------------------------------------------------------------------------------------------------------------------------------------------------------|-----------------|
| Results of additional analyses | 23 | Give results of additional analyses, if done (e.g., sensitivity or subgroup analyses, meta-regression analyses, <i>alternative network geometries studied, alternative choice of prior distributions for Bayesian analyses</i> , and so forth).                                                                                                                                                                                | <i>p. 15-16</i> |
| <b>DISCUSSION</b>              |    |                                                                                                                                                                                                                                                                                                                                                                                                                                |                 |
| Summary of evidence            | 24 | Summarize the main findings, including the strength of evidence for each main outcome; consider their relevance to key groups (e.g., healthcare providers, users, and policy-makers).                                                                                                                                                                                                                                          | p. 17-18        |
| Limitations                    | 25 | Discuss limitations at study and outcome level (e.g., risk of bias), and at review level (e.g., incomplete retrieval of identified research, reporting bias). <i>Comment on the validity of the assumptions, such as transitivity and consistency. Comment on any concerns regarding network geometry (e.g., avoidance of certain comparisons).</i>                                                                            | p. 21-22        |
| Conclusions                    | 26 | Provide a general interpretation of the results in the context of other evidence, and implications for future research.                                                                                                                                                                                                                                                                                                        | p. 22-23        |
| <b>FUNDING</b>                 |    |                                                                                                                                                                                                                                                                                                                                                                                                                                |                 |
| Funding                        | 27 | Describe sources of funding for the systematic review and other support (e.g., supply of data); role of funders for the systematic review. This should also include information regarding whether funding has been received from manufacturers of treatments in the network and/or whether some of the authors are content experts with professional conflicts of interest that could affect use of treatments in the network. | <i>p. 23</i>    |

PICOS = population, intervention, comparators, outcomes, study design; NA, not available.

\*Text in italics indicates wording specific to reporting of network meta-analyses that has been added to guidance from the PRISMA statement.

†Authors may wish to plan for use of appendices to present all relevant information in full detail for items in this section.

**Table S2.** Newcastle–Ottawa quality assessment of individual studies

| Authors, year                         | Selection     |   |   |   | Comparability |   | Exposure |       | Sum |
|---------------------------------------|---------------|---|---|---|---------------|---|----------|-------|-----|
|                                       | 1             | 2 | 3 | 4 | 1             | 2 | 1        | 2 (3) |     |
| Ho et al, 2017 <sup>3</sup>           | ◆DSM-IV       |   | ◆ | ◆ | ◆             | ◆ | ◆        | ◆     | 7   |
| Zheng et al, 2019 <sup>7</sup>        | ◆DSM-IV       |   |   | ◆ | ◆             | ◆ | ◆        | ◆     | 6   |
| du Plessis et al, 2020 <sup>8</sup>   | ◆DSM-IV       |   | ◆ | ◆ | ◆             | ◆ | ◆        | ◆     | 7   |
| Nakahara et al, 2020 <sup>9</sup>     | ◆DSM-IV       |   |   | ◆ | ◆             | ◆ | ◆        | ◆     | 6   |
| Ohi et al, 2021 <sup>10</sup>         | ◆DSM-V        |   | ◆ | ◆ | ◆             | ◆ | ◆        | ◆     | 7   |
| Sasabayashi et al, 2021 <sup>11</sup> | ◆DSM-IV+DSM-V |   | ◆ | ◆ | ◆             | ◆ | ◆        | ◆     | 7   |
| Xiu et al, 2021 <sup>4</sup>          | ◆DSM-IV       |   | ◆ | ◆ | ◆             | ◆ | ◆        | ◆     | 7   |
| Cao et al, 2017 <sup>5</sup>          | ◆DSM-IV       |   | ◆ | ◆ | ◆             | ◆ | ◆        | ◆     | 7   |
| Doolin et al, 2018 <sup>12</sup>      | ◆DSM-IV       |   | ◆ | ◆ | ◆             | ◆ | ◆        | ◆     | 7   |
| Maller et al, 2018 <sup>13</sup>      | ◆DSM-IV       |   |   | ◆ | ◆             | ◆ | ◆        | ◆     | 6   |
| Na et al, 2018 <sup>14</sup>          | ◆DSM-IV       |   |   | ◆ | ◆             | ◆ | ◆        | ◆     | 6   |
| Xu et al, 2018 <sup>15</sup>          | ◆ICD-10       |   | ◆ | ◆ | ◆             | ◆ | ◆        | ◆     | 7   |
| Han et al, 2019 <sup>16</sup>         | ◆DSM-IV       |   | ◆ | ◆ | ◆             | ◆ | ◆        | ◆     | 7   |
| Roddy et al, 2019 <sup>17</sup>       | ◆DSM-IV       |   |   | ◆ | ◆             | ◆ | ◆        | ◆     | 6   |
| Yuan et al, 2020 <sup>18</sup>        | ◆DSM-IV       |   |   | ◆ | ◆             | ◆ | ◆        | ◆     | 6   |

DSM = Diagnostic and Statistical Manual of Mental Disorders; ICD = International

Classification of Diseases; Sum = summary.

**Table S3.** Direct volume comparisons between SCZ patients and HC. This network meta-analysis analyzed 7 studies that reported ICV.

| <b>Regions of interest</b>      | <b>MD</b> | <b>Lower CI</b> | <b>Upper CI</b> | <b><i>P</i><sub>adjusted</sub></b> | <b><i>I</i>-squared</b> | <b>Number<br/>of studies</b> | <b>SCZ</b> | <b>HC</b> |
|---------------------------------|-----------|-----------------|-----------------|------------------------------------|-------------------------|------------------------------|------------|-----------|
| <b>Left whole hippocampus*</b>  | -172.658  | -288.097        | -57.219         | 0.01                               | 2%                      | 3                            | 454        | 385       |
| Left CA1*                       | -27.256   | -47.601         | -6.910          | 0.02                               | 0%                      | 3                            | 454        | 385       |
| Left CA3                        | -7.921    | -15.373         | -0.468          | 0.054                              | 57%                     | 3                            | 454        | 385       |
| Left CA4*                       | -11.260   | -18.457         | -4.062          | 0.01                               | 9%                      | 3                            | 454        | 385       |
| Left GC/DG*                     | -13.157   | -22.020         | -4.295          | 0.01                               | 41%                     | 3                            | 454        | 385       |
| Left subiculum*                 | -15.920   | -26.852         | -4.988          | 0.01                               | 0%                      | 3                            | 454        | 385       |
| Left presubiculum               | -11.289   | -26.734         | 4.156           | 0.15                               | 0%                      | 2                            | 253        | 260       |
| Left parasubiculum              | -3.321    | -6.642          | 0.000           | 0.07                               | 46%                     | 2                            | 253        | 260       |
| Left molecular layer*           | -22.757   | -39.766         | -5.749          | 0.02                               | 0%                      | 3                            | 454        | 385       |
| Left hippocampal tail*          | -34.715   | -58.863         | -10.567         | 0.01                               | 53%                     | 3                            | 454        | 385       |
| Left fimbria                    | -3.112    | -6.689          | 0.465           | 0.10                               | 0%                      | 2                            | 253        | 260       |
| Left hippocampal fissure*       | 4.947     | 0.501           | 9.392           | 0.047                              | 0%                      | 2                            | 253        | 260       |
| Left HATA                       | -2.273    | -4.915          | 0.369           | 0.10                               | 63%                     | 2                            | 253        | 260       |
| <b>Right whole hippocampus*</b> | -153.469  | -274.220        | -32.719         | 0.03                               | 24%                     | 3                            | 454        | 385       |

|                            |         |         |        |        |     |   |     |     |
|----------------------------|---------|---------|--------|--------|-----|---|-----|-----|
| Right CA1*                 | -24.553 | -47.564 | -1.542 | 0.04   | 0%  | 3 | 454 | 385 |
| Right CA3*                 | -6.592  | -12.501 | -0.682 | 0.04   | 32% | 3 | 454 | 385 |
| Right CA4*                 | -9.807  | -15.932 | -3.682 | 0.006  | 0%  | 3 | 454 | 385 |
| Right GC/DG*               | -11.413 | -18.472 | -4.353 | 0.006  | 0%  | 3 | 454 | 385 |
| Right subiculum*           | -14.111 | -27.285 | -0.936 | 0.04   | 3%  | 3 | 454 | 385 |
| Right presubiculum         | -9.936  | -26.765 | 6.893  | 0.25   | 0%  | 2 | 253 | 260 |
| Right parasubiculum*       | -3.462  | -6.609  | -0.316 | 0.04   | 0%  | 2 | 253 | 260 |
| Right molecular layer*     | -20.831 | -37.467 | -4.195 | 0.03   | 0%  | 3 | 454 | 385 |
| Right hippocampal tail     | -25.071 | -51.842 | 1.701  | 0.07   | 36% | 3 | 454 | 385 |
| Right fimbria*             | -4.542  | -8.211  | -0.874 | 0.03   | 0%  | 2 | 253 | 260 |
| Right hippocampal fissure* | 9.789   | 5.313   | 14.264 | <0.001 | 0%  | 2 | 253 | 260 |
| Right HATA*                | -2.761  | -4.388  | -1.134 | 0.006  | 0%  | 2 | 253 | 260 |

SCZ = schizophrenia; HC = healthy controls; MD = mean difference; CI = confidence interval; CA = cornu ammonis; GC/DG = granule cell layer of the dentate gyrus; HATA = hippocampus–amygdala transition area.

Statistical significance is indicated by \*. The unit of mean difference is cubic millimeters.

**Table S4.** Direct volume comparisons between MDD patients and HC. This network meta-analysis analyzed 7 studies that reported ICV.

| <b>Regions of interest</b>     | <b>MD</b> | <b>Lower CI</b> | <b>Upper CI</b> | <b><i>P</i><sub>adjusted</sub></b> | <b><i>I</i>-squared</b> | <b>Number<br/>of studies</b> | <b>MDD</b> | <b>HC</b> |
|--------------------------------|-----------|-----------------|-----------------|------------------------------------|-------------------------|------------------------------|------------|-----------|
| <b>Left whole hippocampus</b>  | -31.646   | -165.724        | 102.433         | 0.95                               | 91%                     | 3                            | 331        | 233       |
| Left CA1                       | -5.726    | -27.303         | 15.851          | 0.95                               | 84%                     | 4                            | 372        | 277       |
| Left CA3                       | -4.348    | -12.195         | 3.499           | 0.95                               | 73%                     | 4                            | 372        | 277       |
| Left CA4                       | -6.911    | -15.486         | 1.664           | 0.95                               | 82%                     | 3                            | 331        | 233       |
| Left GC/DG                     | -5.926    | -15.197         | 3.346           | 0.95                               | 79%                     | 4                            | 372        | 277       |
| Left subiculum                 | -2.332    | -13.727         | 9.063           | 0.95                               | 75%                     | 4                            | 372        | 277       |
| Left presubiculum              | 0.361     | -12.416         | 13.138          | 0.96                               | 85%                     | 3                            | 331        | 233       |
| Left parasubiculum             | -0.198    | -3.230          | 2.834           | 0.96                               | 59%                     | 3                            | 270        | 142       |
| Left molecular layer           | -8.899    | -29.039         | 11.241          | 0.95                               | 89%                     | 3                            | 331        | 233       |
| Left hippocampal tail          | 3.824     | -29.374         | 37.022          | 0.96                               | 95%                     | 2                            | 284        | 203       |
| Left fimbria                   | /         | /               | /               | /                                  | /                       | /                            | /          | /         |
| Left hippocampal fissure       | /         | /               | /               | /                                  | /                       | /                            | /          | /         |
| Left HATA                      | 1.010     | -2.629          | 4.649           | 0.95                               | /                       | 1                            | 182        | 68        |
| <b>Right whole hippocampus</b> | -21.822   | -159.795        | 116.152         | 0.92                               | 91%                     | 3                            | 331        | 233       |
| Right CA1                      | -7.203    | -30.809         | 16.403          | 0.92                               | 86%                     | 4                            | 372        | 277       |
| Right CA3                      | -2.604    | -8.870          | 3.661           | 0.92                               | 38%                     | 4                            | 372        | 277       |

|                           |        |         |        |       |     |   |     |     |
|---------------------------|--------|---------|--------|-------|-----|---|-----|-----|
| Right CA4                 | -4.170 | -11.224 | 2.885  | 0.90  | 70% | 3 | 331 | 233 |
| Right GC/DG               | -5.441 | -12.698 | 1.815  | 0.78  | 64% | 4 | 372 | 277 |
| Right subiculum           | -2.826 | -16.710 | 11.059 | 0.92  | 84% | 4 | 372 | 277 |
| Right presubiculum        | 0.524  | -13.223 | 14.271 | 0.94  | 89% | 3 | 331 | 233 |
| Right parasubiculum       | 0.220  | -2.673  | 3.112  | 0.94  | 69% | 3 | 270 | 142 |
| Right molecular layer     | -6.816 | -26.164 | 12.532 | 0.92  | 88% | 3 | 331 | 233 |
| Right hippocampal tail    | 9.003  | -27.860 | 45.866 | 0.92  | 96% | 2 | 284 | 203 |
| Right fimbria             | /      | /       | /      | /     | /   | / | /   | /   |
| Right hippocampal fissure | /      | /       | /      | /     | /   | / | /   | /   |
| Right HATA*               | 2.950  | 1.241   | 4.659  | 0.008 | /   | 1 | 182 | 68  |

MDD = major depressive disorder; HC = healthy controls; MD = mean difference; CI = confidence interval; CA = cornu ammonis; GC/DG = granule cell layer of the dentate gyrus; HATA = hippocampus–amygdala transition area; NA, not available.

Statistical significance is indicated by \*. The unit of mean difference is cubic millimeters.



**Table S5.** Indirect volume comparisons between SCZ and MDD patients. This network meta-analysis analyzed 7 studies that reported ICV.

| <b>Regions of interest</b>     | <b>MD</b> | <b>Lower CI</b> | <b>Upper CI</b> | <b><i>P</i><sub>adjusted</sub></b> |
|--------------------------------|-----------|-----------------|-----------------|------------------------------------|
| <b>Left whole hippocampus</b>  | -141.012  | -317.939        | 35.915          | 0.32                               |
| Left CA1                       | -21.530   | -51.186         | 8.127           | 0.32                               |
| Left CA3                       | -3.573    | -14.395         | 7.249           | 0.52                               |
| Left CA4                       | -4.349    | -15.544         | 6.846           | 0.49                               |
| Left GC/DG                     | -7.232    | -20.058         | 5.595           | 0.37                               |
| Left subiculum                 | -13.588   | -29.379         | 2.203           | 0.32                               |
| Left presubiculum              | -11.650   | -31.695         | 8.395           | 0.37                               |
| Left parasubiculum             | -3.123    | -7.620          | 1.374           | 0.32                               |
| Left molecular layer           | -13.858   | -40.219         | 12.503          | 0.37                               |
| Left hippocampal tail          | -38.539   | -79.590         | 2.513           | 0.32                               |
| Left fimbria                   | /         | /               | /               | /                                  |
| Left hippocampal fissure       | /         | /               | /               | /                                  |
| Left HATA                      | -3.283    | -7.779          | 1.214           | 0.32                               |
| <b>Right whole hippocampus</b> | -131.648  | -314.998        | 51.703          | 0.36                               |
| Right CA1                      | -17.350   | -50.316         | 15.615          | 0.36                               |
| Right CA3                      | -3.987    | -12.600         | 4.625           | 0.36                               |
| Right CA4                      | -5.638    | -14.980         | 3.705           | 0.36                               |
| Right GC/DG                    | -5.972    | -16.096         | 4.152           | 0.36                               |
| Right subiculum                | -11.285   | -30.425         | 7.855           | 0.36                               |
| Right presubiculum             | -10.460   | -32.190         | 11.270          | 0.36                               |
| Right parasubiculum            | -3.682    | -7.956          | 0.592           | 0.36                               |
| Right molecular layer          | -14.015   | -39.532         | 11.502          | 0.36                               |
| Right hippocampal tail         | -34.074   | -79.632         | 11.485          | 0.36                               |
| Right fimbria                  | /         | /               | /               | /                                  |
| Right hippocampal fissure      | /         | /               | /               | /                                  |

|             |        |        |        |        |
|-------------|--------|--------|--------|--------|
| Right HATA* | -5.711 | -8.070 | -3.351 | <0.001 |
|-------------|--------|--------|--------|--------|

---

SCZ = schizophrenia; MDD = major depressive disorder; MD = mean difference; CI = confidence interval; CA = cornu ammonis; GC/DG = granule cell layer of the dentate gyrus; HATA = hippocampus–amygdala transition area.

Statistical significance is indicated by \*. The unit of mean difference is cubic millimeters.

**Table S6.** Direct cross-sectional volume comparisons between SCZ and MDD patients (for 7 studies that reported ICV)

| Regions of interest | SCZ |         |        | MDD |         |        | Z     | <i>P</i> <sub>adjusted</sub> |
|---------------------|-----|---------|--------|-----|---------|--------|-------|------------------------------|
|                     | n   | mean    | SD     | n   | mean    | SD     |       |                              |
| <b>Left</b>         |     |         |        |     |         |        |       |                              |
| whole hippocampus   | 454 | 2523.40 | 485.00 | 331 | 2220.01 | 207.11 | 11.92 | 5.07E-32                     |
| CA1                 | 454 | 450.68  | 79.54  | 372 | 413.91  | 49.82  | 8.10  | 7.58E-16                     |
| CA3                 | 454 | 164.52  | 51.55  | 372 | 137.52  | 20.14  | 10.25 | 4.55E-24                     |
| CA4                 | 454 | 186.59  | 40.04  | 331 | 167.83  | 19.91  | 8.63  | 9.99E-18                     |
| GC/DG               | 454 | 214.37  | 40.66  | 372 | 194.83  | 21.67  | 8.82  | 2.09E-18                     |
| subiculum           | 454 | 308.40  | 48.19  | 372 | 274.85  | 28.64  | 12.40 | 2.97E-34                     |
| presubiculum        | 253 | 203.45  | 27.37  | 331 | 184.71  | 20.83  | 9.07  | 2.71E-19                     |
| parasubiculum       | 253 | 40.16   | 7.33   | 270 | 36.86   | 6.96   | 5.27  | 1.53E-07                     |
| molecular layer     | 454 | 386.01  | 49.37  | 331 | 366.65  | 36.47  | 6.32  | 3.21E-10                     |
| hippocampal tail    | 454 | 401.77  | 93.92  | 284 | 353.16  | 47.66  | 9.28  | 4.62E-20                     |
| fimbria             | /   | /       | /      | /   | /       | /      | /     | /                            |
| hippocampal fissure | /   | /       | /      | /   | /       | /      | /     | /                            |
| HATA                | 253 | 38.89   | 6.13   | 182 | 39.92   | 4.85   | -1.96 | 0.0497                       |
| <b>Right</b>        |     |         |        |     |         |        |       |                              |
| whole hippocampus   | 454 | 2610.27 | 511.52 | 331 | 2243.57 | 218.08 | 13.67 | 8.86E-42                     |
| CA1                 | 454 | 469.74  | 80.73  | 372 | 422.24  | 51.12  | 10.27 | 1.73E-24                     |
| CA3                 | 454 | 176.61  | 54.40  | 372 | 144.58  | 21.42  | 11.51 | 4.55E-30                     |
| CA4                 | 454 | 195.96  | 44.65  | 331 | 173.18  | 19.85  | 9.64  | 8.25E-22                     |
| GC/DG               | 454 | 224.05  | 43.94  | 372 | 198.46  | 22.06  | 10.85 | 4.29E-27                     |
| subiculum           | 454 | 310.88  | 49.43  | 372 | 272.06  | 31.40  | 13.70 | 8.86E-42                     |

|                     |     |        |       |     |        |       |       |          |
|---------------------|-----|--------|-------|-----|--------|-------|-------|----------|
| presubiculum        | 253 | 195.49 | 25.56 | 331 | 177.24 | 19.13 | 9.50  | 2.79E-21 |
| parasubiculum       | 253 | 38.20  | 6.81  | 270 | 35.00  | 6.55  | 5.47  | 4.39E-08 |
| molecular layer     | 454 | 401.04 | 52.28 | 331 | 372.05 | 36.55 | 9.14  | 7.36E-20 |
| hippocampal tail    | 454 | 423.31 | 97.11 | 284 | 363.50 | 49.73 | 11.02 | 8.77E-28 |
| fimbria             | /   | /      | /     | /   | /      | /     | /     | /        |
| hippocampal fissure | /   | /      | /     | /   | /      | /     | /     | /        |
| HATA                | 253 | 40.06  | 6.29  | 182 | 36.93  | 4.25  | 6.19  | 6.51E-10 |

SCZ = schizophrenia; MDD = major depressive disorder; SD = standard deviation; CA = cornu ammonis; GC/DG = granule cell layer of the dentate gyrus; HATA = hippocampus–amygdala transition area.

**Table S7.** Univariate meta-regression to identify potential sources of heterogeneity in direct volume comparisons between SCZ patients and HC and between MDD patients and HC

| Regions of interest   | Dependent variable | Independent variable | Number of comparisons | Coefficient | 95% CI         | <i>P</i> | <i>P<sub>adjusted</sub></i> |
|-----------------------|--------------------|----------------------|-----------------------|-------------|----------------|----------|-----------------------------|
| <b>SCZ versus HC</b>  |                    |                      |                       |             |                |          |                             |
| Left hippocampal tail | Mean Difference    | age at onset         | 7                     | -0.912      | -1.586, -0.237 | 0.008*   | 0.01*                       |
| Left hippocampal tail | Mean Difference    | age at study         | 8                     | -0.700      | -1.122, -0.278 | 0.001*   | 0.002*                      |
| Left hippocampal tail | Mean Difference    | illness duration     | 7                     | -1.775      | -3.272, -0.279 | 0.02*    | 0.02*                       |
| Left hippocampal tail | Mean Difference    | PANSS                | 6                     | -0.379      | -0.620, -0.208 | < 0.001* | < 0.001*                    |
| <b>MDD versus HC</b>  |                    |                      |                       |             |                |          |                             |
| Left CA1              | Mean Difference    | age at onset         | 6                     | -0.445      | -1.145, 0.255  | 0.21     | 0.52                        |
| Left CA1              | Mean Difference    | age at study         | 8                     | -0.340      | -0.914, 0.234  | 0.25     | 0.56                        |
| Left CA1              | Mean Difference    | illness duration     | 6                     | -0.344      | -2.994, 2.306  | 0.80     | 0.95                        |
| Left CA1              | Mean Difference    | HDRS                 | 7                     | -0.970      | -2.204, 0.265  | 0.12     | 0.43                        |
| Left CA3              | Mean Difference    | age at onset         | 6                     | -0.236      | -0.446, -0.026 | 0.03*    | 0.27                        |
| Left CA3              | Mean Difference    | age at study         | 8                     | -0.208      | -0.386, -0.030 | 0.02*    | 0.27                        |

|                   |                 |                  |   |        |                |       |      |
|-------------------|-----------------|------------------|---|--------|----------------|-------|------|
| Left CA3          | Mean Difference | illness duration | 6 | -0.112 | -1.089, 0.866  | 0.82  | 0.96 |
| Left CA3          | Mean Difference | HDRS             | 7 | -0.444 | -0.841, -0.047 | 0.03* | 0.27 |
| Left CA4          | Mean Difference | age at onset     | 5 | -0.234 | -0.456, -0.012 | 0.04* | 0.27 |
| Left CA4          | Mean Difference | age at study     | 7 | -0.225 | -0.406, -0.043 | 0.02* | 0.27 |
| Left CA4          | Mean Difference | illness duration | 5 | -0.412 | -1.830, 1.006  | 0.57  | 0.92 |
| Left CA4          | Mean Difference | HDRS             | 6 | -0.455 | -0.859, -0.051 | 0.03* | 0.27 |
| Left GC/DG        | Mean Difference | age at onset     | 6 | -0.261 | -0.502, -0.020 | 0.03* | 0.27 |
| Left GC/DG        | Mean Difference | age at study     | 6 | -0.182 | -0.400, 0.036  | 0.10  | 0.41 |
| Left GC/DG        | Mean Difference | illness duration | 6 | -0.225 | -1.330, 0.880  | 0.69  | 0.95 |
| Left GC/DG        | Mean Difference | HDRS             | 6 | -0.358 | -0.855, 0.140  | 0.16  | 0.50 |
| Left subiculum    | Mean Difference | age at onset     | 6 | -0.185 | -0.565, 0.194  | 0.34  | 0.65 |
| Left subiculum    | Mean Difference | age at study     | 8 | -0.196 | -0.482, 0.089  | 0.18  | 0.52 |
| Left subiculum    | Mean Difference | illness duration | 6 | -0.178 | -1.561, 1.204  | 0.80  | 0.95 |
| Left subiculum    | Mean Difference | HDRS             | 7 | -0.387 | -0.982, 0.209  | 0.20  | 0.52 |
| Left presubiculum | Mean Difference | age at onset     | 5 | 0.008  | -0.262, 0.277  | 0.96  | 1.00 |
| Left presubiculum | Mean Difference | age at study     | 5 | 0.015  | -0.214, 0.242  | 0.90  | 0.99 |
| Left presubiculum | Mean Difference | illness duration | 5 | 0.268  | -0.936, 1.471  | 0.66  | 0.95 |

|                      |                 |                  |   |        |                |       |      |
|----------------------|-----------------|------------------|---|--------|----------------|-------|------|
| Left presubiculum    | Mean Difference | HDRS             | 5 | 0.083  | -0.405, 0.571  | 0.74  | 0.95 |
| Left molecular layer | Mean Difference | age at onset     | 5 | -0.137 | -0.710, 0.437  | 0.64  | 0.95 |
| Left molecular layer | Mean Difference | age at study     | 5 | -0.097 | -0.591, 0.397  | 0.70  | 0.95 |
| Left molecular layer | Mean Difference | illness duration | 5 | -0.003 | -2.797, 2.790  | 1.00  | 1.00 |
| Left molecular layer | Mean Difference | HDRS             | 5 | 0.004  | -1.124, 1.132  | 0.99  | 1.00 |
| Right CA1            | Mean Difference | age at onset     | 6 | -0.307 | -0.915, 0.301  | 0.32  | 0.65 |
| Right CA1            | Mean Difference | age at study     | 8 | -0.251 | -0.685, 0.184  | 0.26  | 0.56 |
| Right CA1            | Mean Difference | illness duration | 6 | -0.074 | -2.291, 2.142  | 0.95  | 1.00 |
| Right CA1            | Mean Difference | HDRS             | 7 | -0.452 | -1.416, 0.512  | 0.36  | 0.67 |
| Right CA3            | Mean Difference | age at onset     | 6 | -0.112 | -0.304, 0.080  | 0.25  | 0.56 |
| Right CA3            | Mean Difference | age at study     | 8 | -0.112 | -0.288, 0.065  | 0.21  | 0.52 |
| Right CA3            | Mean Difference | illness duration | 6 | 0.009  | -0.747, 0.766  | 0.98  | 1.00 |
| Right CA3            | Mean Difference | HDRS             | 7 | -0.346 | -0.684, -0.008 | 0.04* | 0.28 |
| Right CA4            | Mean Difference | age at onset     | 5 | -0.153 | -0.352, 0.045  | 0.13  | 0.43 |
| Right CA4            | Mean Difference | age at study     | 7 | -0.185 | -0.376, 0.007  | 0.06  | 0.30 |
| Right CA4            | Mean Difference | illness duration | 5 | -0.227 | -1.379, 0.925  | 0.70  | 0.95 |
| Right CA4            | Mean Difference | HDRS             | 6 | -0.428 | -0.796, -0.060 | 0.02* | 0.27 |
| Right GC/DG          | Mean Difference | age at onset     | 6 | -0.209 | -0.420, 0.003  | 0.05  | 0.30 |
| Right GC/DG          | Mean Difference | age at study     | 6 | -0.155 | -0.340, 0.031  | 0.10  | 0.41 |

|                       |                 |                  |   |        |                |      |      |
|-----------------------|-----------------|------------------|---|--------|----------------|------|------|
| Right GC/DG           | Mean Difference | illness duration | 6 | -0.331 | -1.286, 0.623  | 0.50 | 0.84 |
| Right GC/DG           | Mean Difference | HDRS             | 6 | -0.356 | -0.749, 0.0380 | 0.08 | 0.36 |
| Right subiculum       | Mean Difference | age at onset     | 6 | -0.208 | -0.597, 0.182  | 0.30 | 0.61 |
| Right subiculum       | Mean Difference | age at study     | 8 | -0.239 | -0.544, 0.066  | 0.12 | 0.43 |
| Right subiculum       | Mean Difference | illness duration | 6 | -0.230 | -1.697, 1.237  | 0.76 | 0.95 |
| Right subiculum       | Mean Difference | HDRS             | 7 | -0.415 | -1.054, 0.223  | 0.20 | 0.52 |
| Right presubiculum    | Mean Difference | age at onset     | 5 | 0.054  | -0.232, 0.342  | 0.71 | 0.95 |
| Right presubiculum    | Mean Difference | age at study     | 5 | 0.056  | -0.184, 0.296  | 0.65 | 0.95 |
| Right presubiculum    | Mean Difference | illness duration | 5 | 0.491  | -0.725, 1.708  | 0.43 | 0.75 |
| Right presubiculum    | Mean Difference | HDRS             | 5 | 0.205  | -0.292, 0.701  | 0.42 | 0.75 |
| Right molecular layer | Mean Difference | age at onset     | 5 | 0.049  | -0.619, 0.716  | 0.89 | 0.99 |
| Right molecular layer | Mean Difference | age at study     | 5 | 0.049  | -0.518, 0.615  | 0.87 | 0.99 |
| Right molecular layer | Mean Difference | illness duration | 5 | 0.396  | -2.678, 3.470  | 0.81 | 0.95 |
| Right molecular layer | Mean Difference | HDRS             | 5 | 0.354  | -0.891, 1.560  | 0.58 | 0.92 |

SCZ = schizophrenia; MDD = major depressive disorder; HC = healthy controls; CI = confidence interval; CA = cornu ammonis; GC/DG = granule cell layer of the dentate gyrus; PANSS = Positive and Negative Syndrome Scale; HDRS = Hamilton Depression Rating Scale.

Statistical significance is indicated by \*.



**Table S8.** Egger's linear regression test

| SCZ VS HC                 |                              | MDD VS HC                 |                              |
|---------------------------|------------------------------|---------------------------|------------------------------|
| Region of interests       | <i>P</i> <sub>adjusted</sub> | Region of interests       | <i>P</i> <sub>adjusted</sub> |
| Left whole hippocampus    | 0.96                         | Left whole hippocampus    | 0.95                         |
| Left CA1                  | 0.96                         | Left CA1                  | 0.95                         |
| Left CA3                  | 0.96                         | Left CA3                  | 0.95                         |
| Left CA4                  | 0.96                         | Left CA4                  | 0.95                         |
| Left GC/DG                | 0.96                         | Left GC/DG                | 0.95                         |
| Left subiculum            | 0.96                         | Left subiculum            | 0.95                         |
| Left presubiculum         | 0.96                         | Left presubiculum         | 0.95                         |
| Left parasubiculum        | 0.96                         | Left parasubiculum        | 0.95                         |
| Left molecular layer      | 0.96                         | Left molecular layer      | 0.95                         |
| Left hippocampal tail     | 0.96                         | Left hippocampal tail     | 0.95                         |
| Left fimbria              | 0.96                         | Left fimbria              | NA                           |
| Left hippocampal fissure  | 0.96                         | Left hippocampal fissure  | NA                           |
| Left HATA                 | 0.96                         | Left HATA                 | NA                           |
| Right Whole hippocampus   | 0.94                         | Right whole hippocampus   | 0.92                         |
| Right CA1                 | 0.94                         | Right CA1                 | 0.92                         |
| Right CA3                 | 0.94                         | Right CA3                 | 0.92                         |
| Right CA4                 | 0.94                         | Right CA4                 | 0.92                         |
| Right GC/DG               | 0.94                         | Right GC/DG               | 0.92                         |
| Right subiculum           | 0.94                         | Right subiculum           | 0.92                         |
| Right presubiculum        | 0.94                         | Right presubiculum        | 0.92                         |
| Right parasubiculum       | 0.94                         | Right parasubiculum       | 0.92                         |
| Right molecular layer     | 0.94                         | Right molecular layer     | 0.92                         |
| Right hippocampal tail    | 0.94                         | Right hippocampal tail    | 0.92                         |
| Right fimbria             | 0.94                         | Right fimbria             | NA                           |
| Right hippocampal fissure | 0.65                         | Right hippocampal fissure | NA                           |
| Right HATA                | 0.039                        | Right HATA                | NA                           |

SCZ = schizophrenia; MDD = major depressive disorder; HC = healthy controls; CA

= cornu ammonis; GC/DG = granule cell layer of the dentate gyrus; HATA =

hippocampus–amygdala transition area; NA = Not available, the number of included studies is too small to be tested for publication bias.

Statistical significance is indicated by \*.

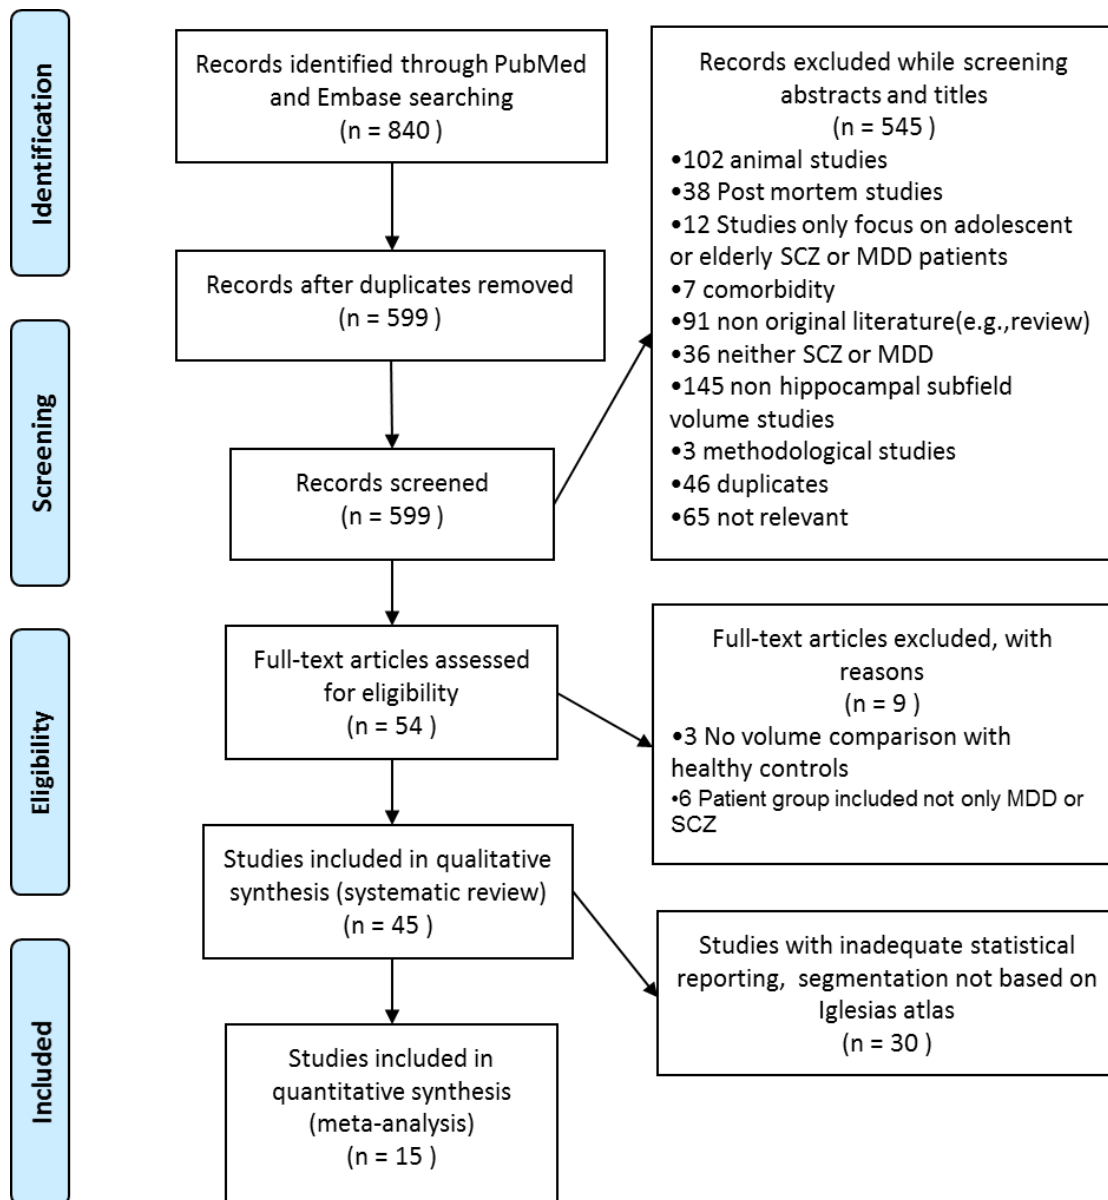

**Fig. S1.** Preferred Reporting Items for Systematic Reviews and Meta-Analyses

(PRISMA) flowchart. SCZ = schizophrenia; MDD = major depressive disorder.

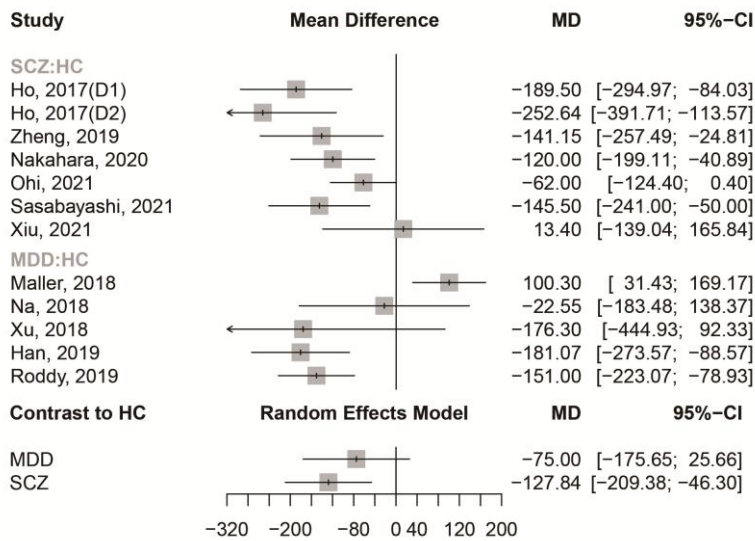

L

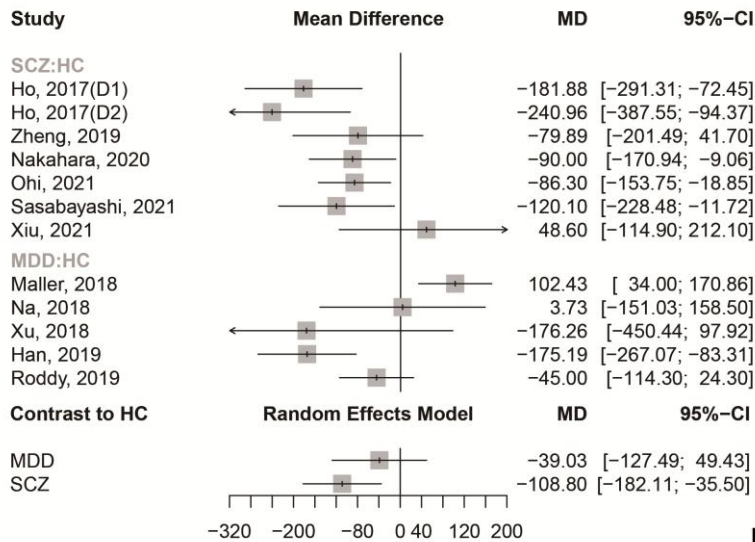

R

**Fig. S2-1.** Forest plots for the whole hippocampus. SCZ = schizophrenia; MDD = major depressive disorder; HC = healthy controls; CI = confidence interval; MD = mean difference; L = left; R = right.

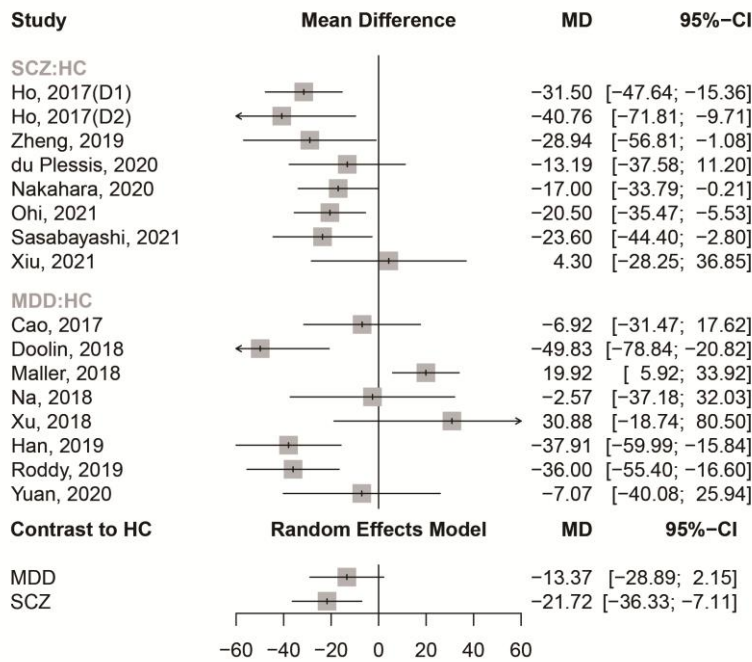

L

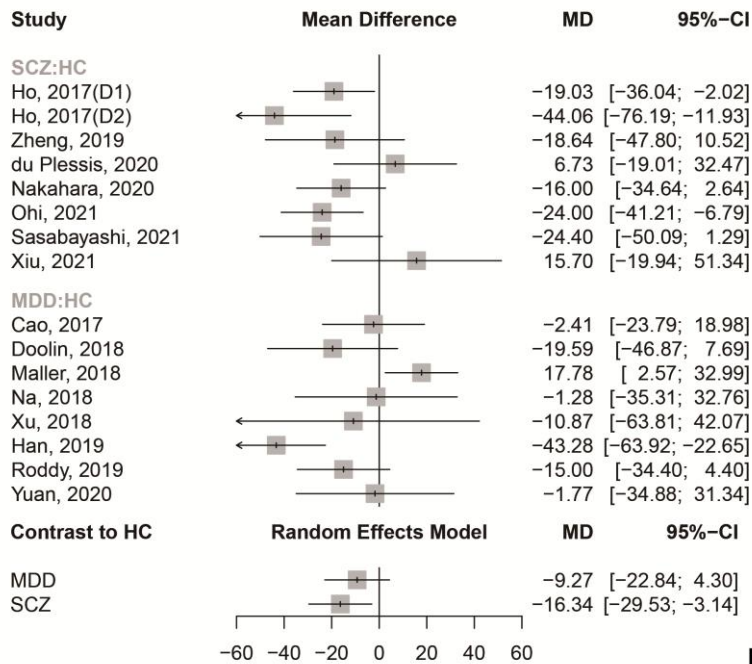

R

**Fig. S2-2.** Forest plots for the CA1. SCZ = schizophrenia; MDD = major depressive disorder; HC = healthy controls; CA = cornu ammonis; CI = confidence interval; L = left; R = right.

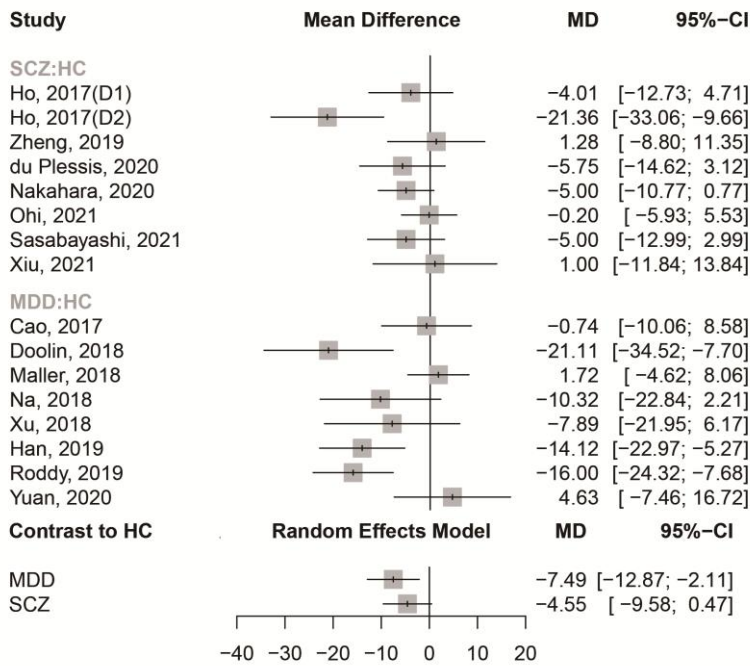

L

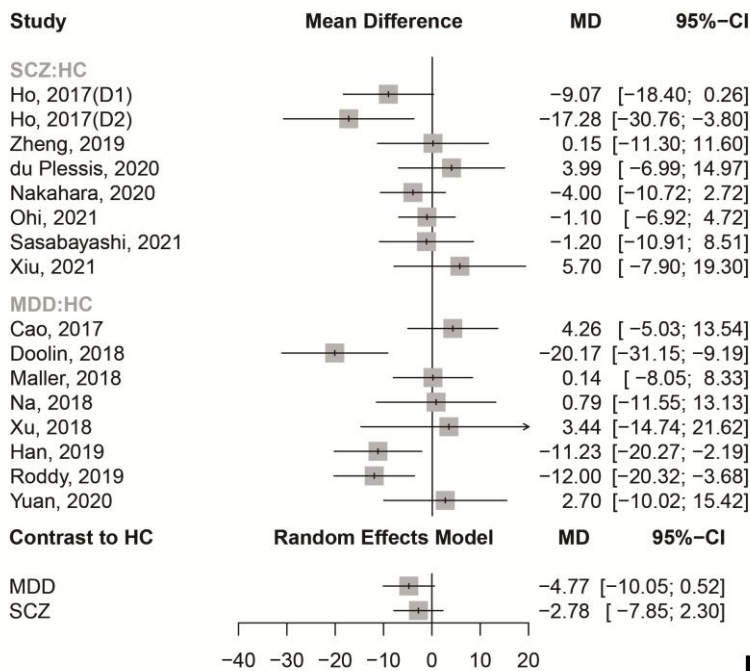

R

**Fig. S2-3.** Forest plots for the CA3. SCZ = schizophrenia; MDD = major depressive disorder; HC = healthy controls; CA = cornu ammonis; CI = confidence interval; L = left; R = right.

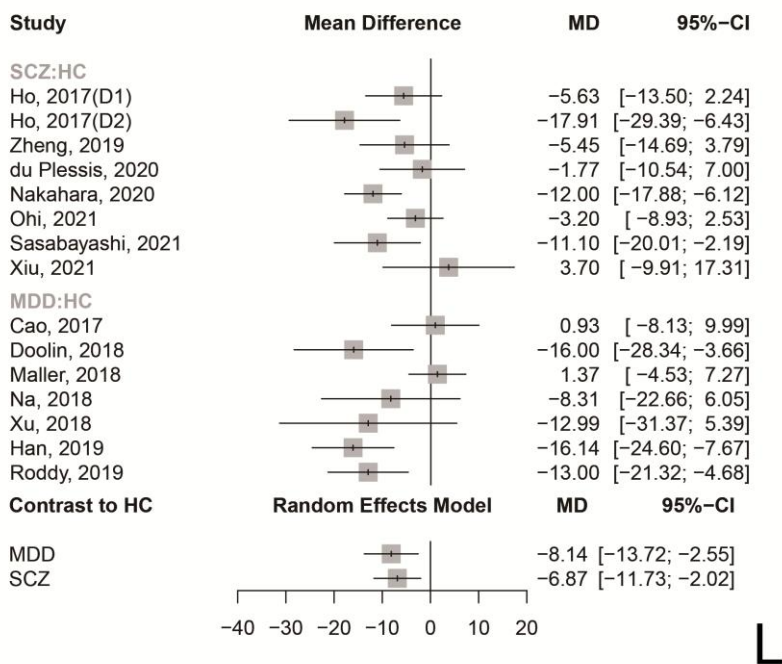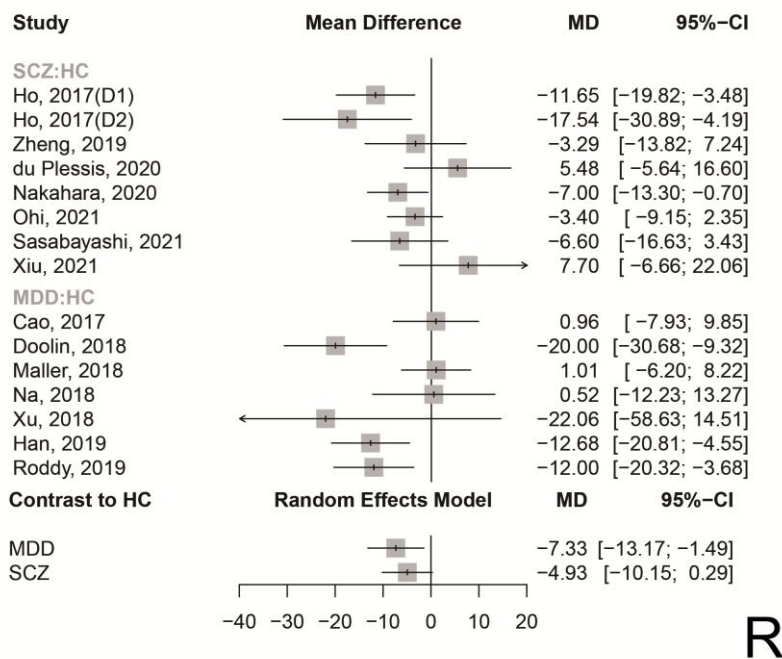

**Fig. S2-4.** Forest plots for the CA4. SCZ = schizophrenia; MDD = major depressive disorder; HC = healthy controls; CA = cornu ammonis; CI = confidence interval; L = left; R = right.

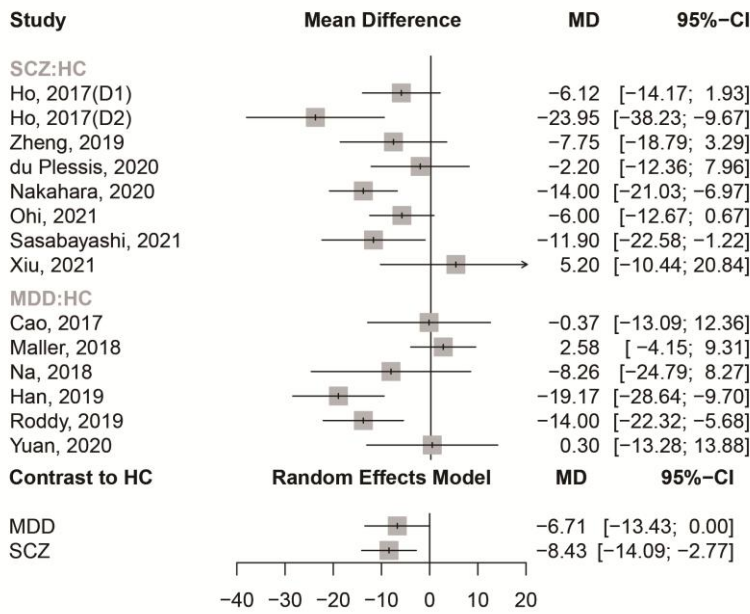

L

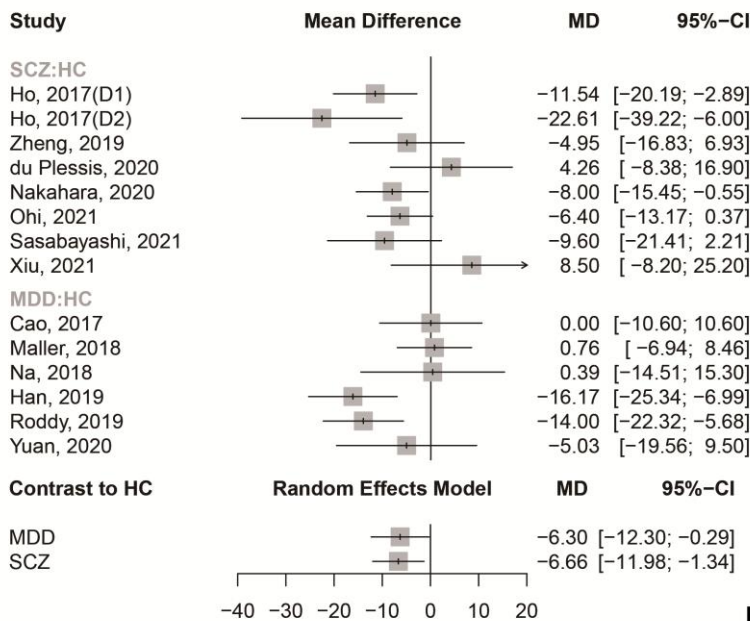

R

**Fig. S2-5.** Forest plots for the GC/DG. SCZ = schizophrenia; MDD = major depressive disorder; HC = healthy controls; GC/DG = granule cell layer of the dentate gyrus; CI = confidence interval; L = left; R = right.



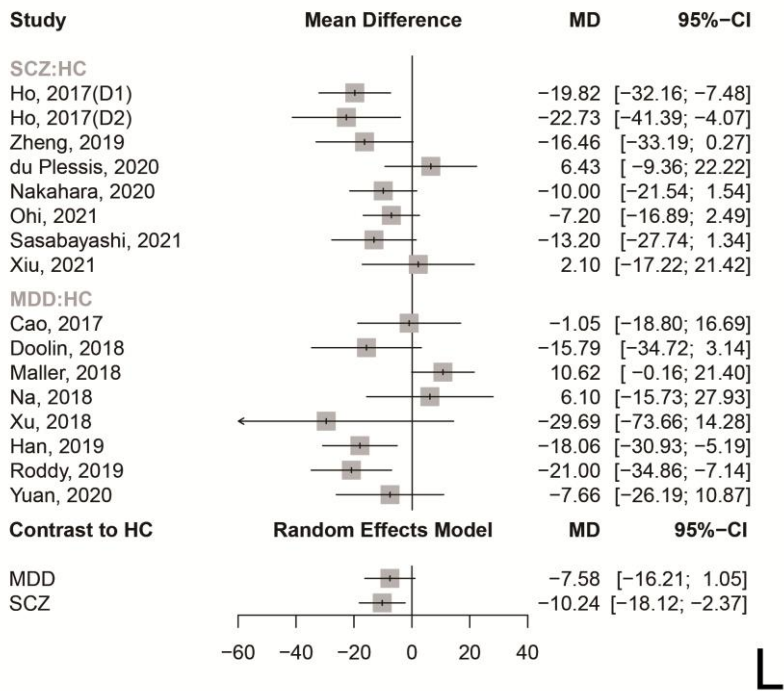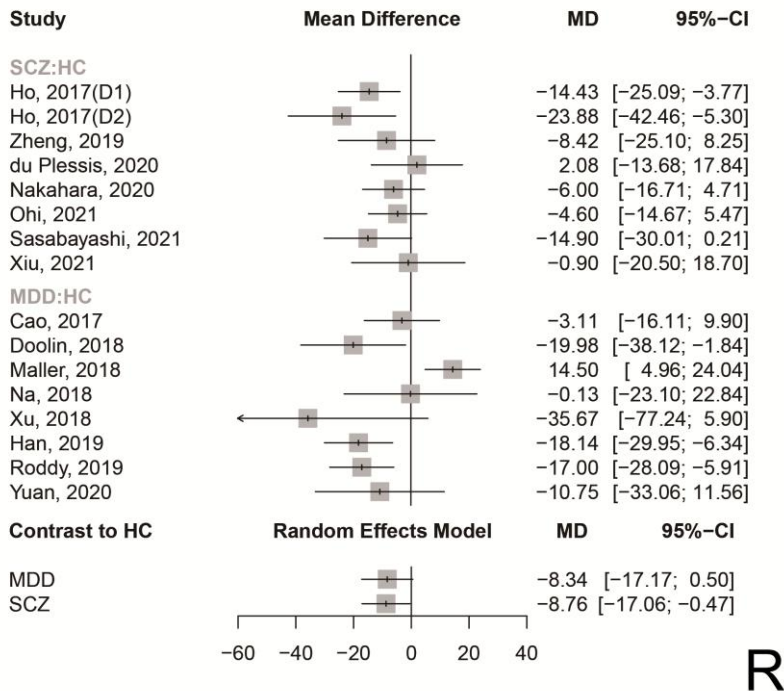

**Fig. S2-6.** Forest plots for the subiculum. SCZ = schizophrenia; MDD = major depressive disorder; HC = healthy controls; CI = confidence interval; L = left; R = right.

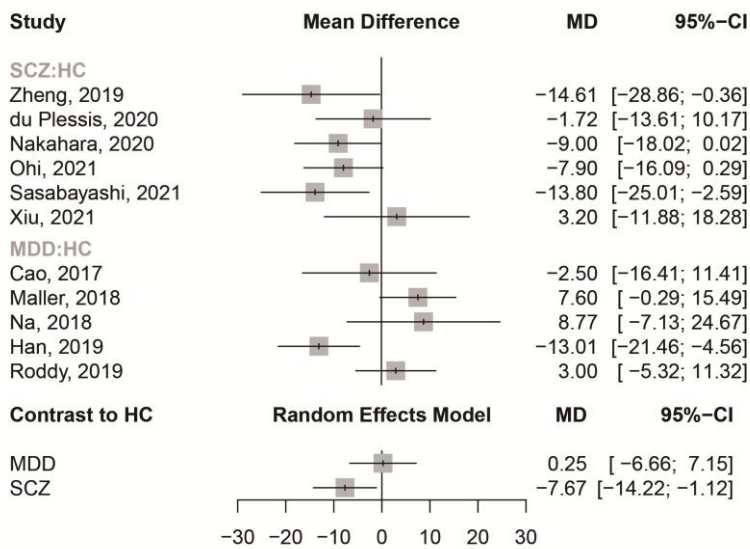

L

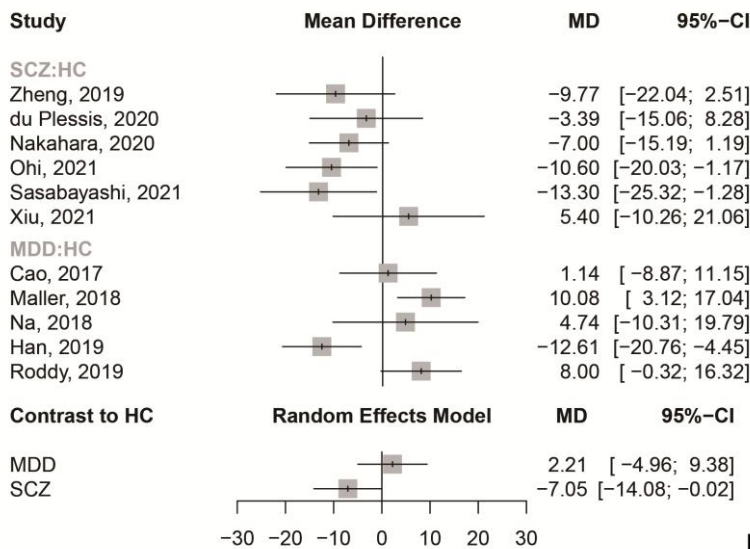

R

**Fig. S2-7.** Forest plots for the presubiculum. SCZ = schizophrenia; MDD = major depressive disorder; HC = healthy controls; CI = confidence interval; L = left; R = right.

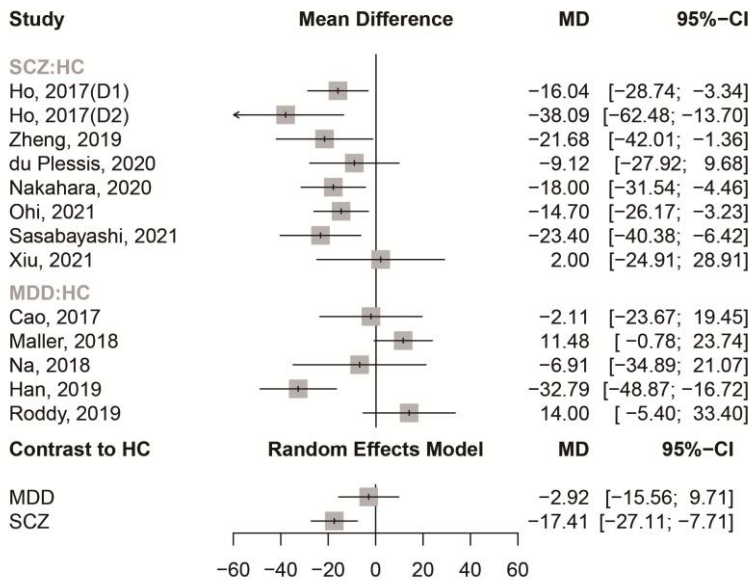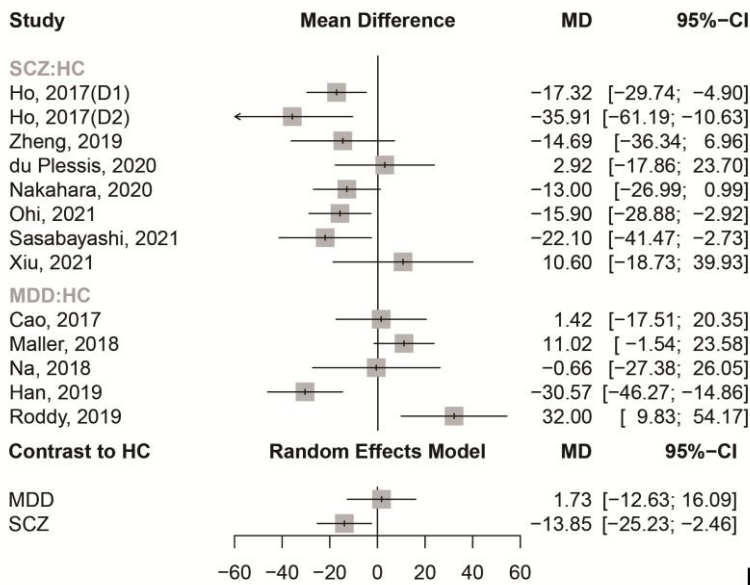

**Fig. S2-8.** Forest plots for the molecular layer. SCZ = schizophrenia; MDD = major depressive disorder; HC = healthy controls; CI = confidence interval; L = left; R = right.

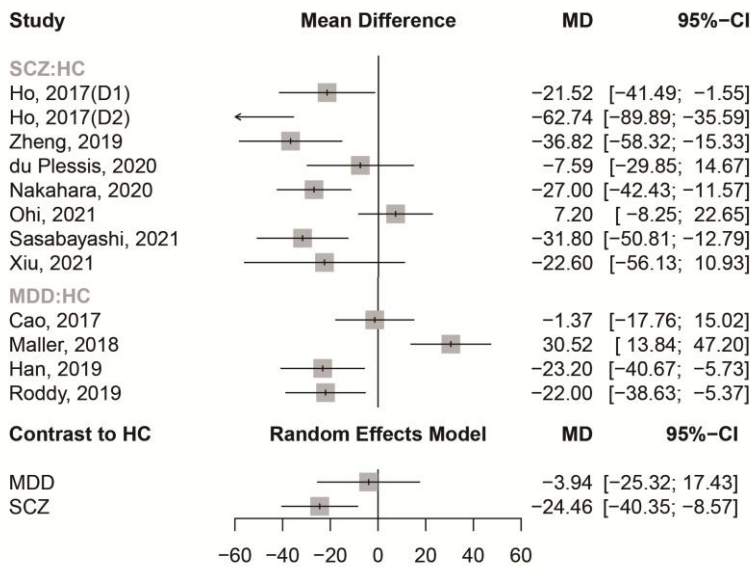

L

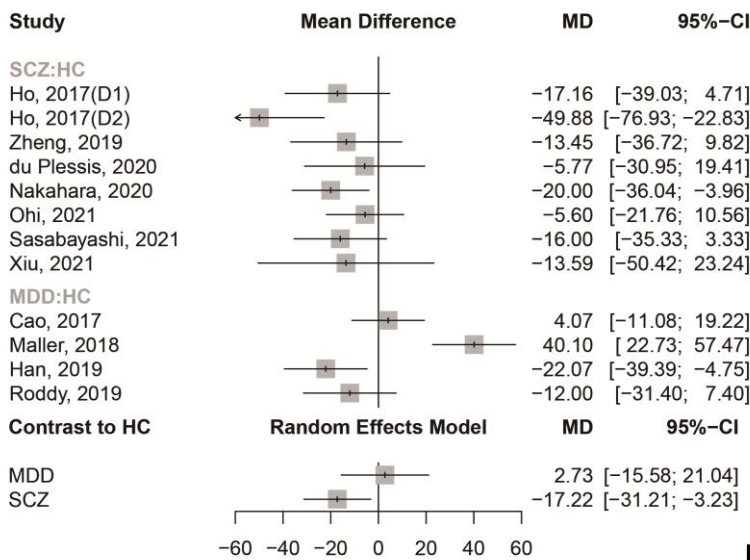

R

**Fig. S2-9.** Forest plots for the hippocampal tail. SCZ = schizophrenia; MDD = major depressive disorder; HC = healthy controls; CI = confidence interval; L = left; R = right.

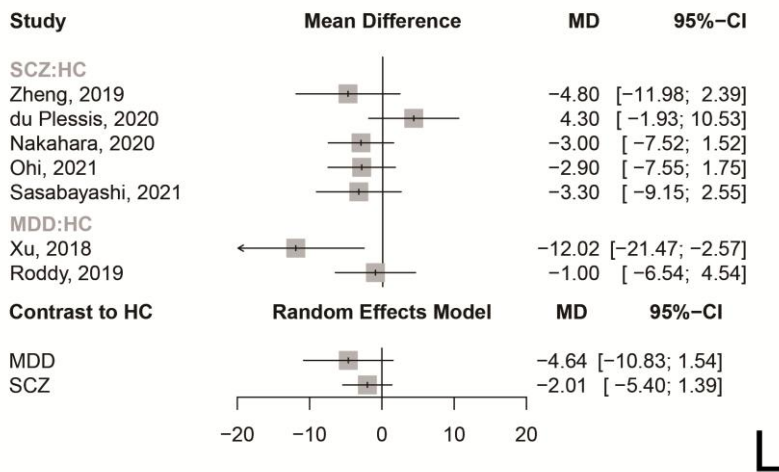

L

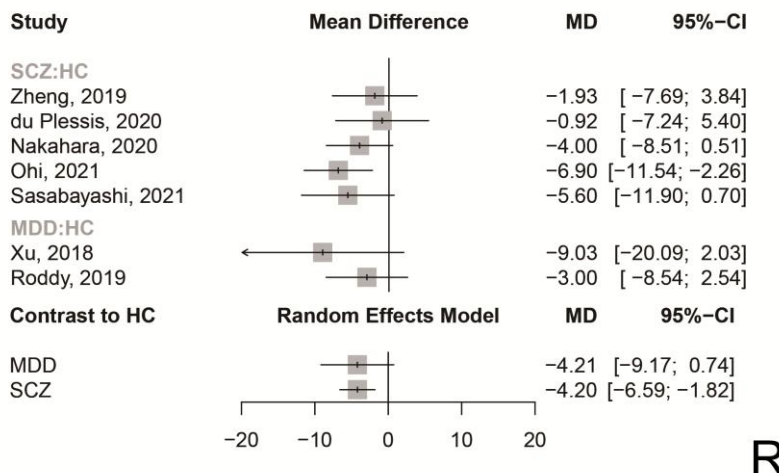

R

**Fig. S2-10.** Forest plots for the fimbria. SCZ = schizophrenia; MDD = major depressive disorder; HC = healthy controls; CI = confidence interval; L = left; R = right.

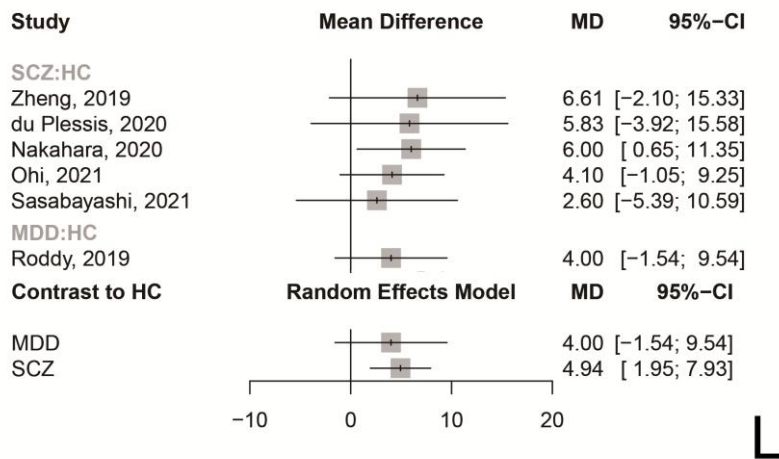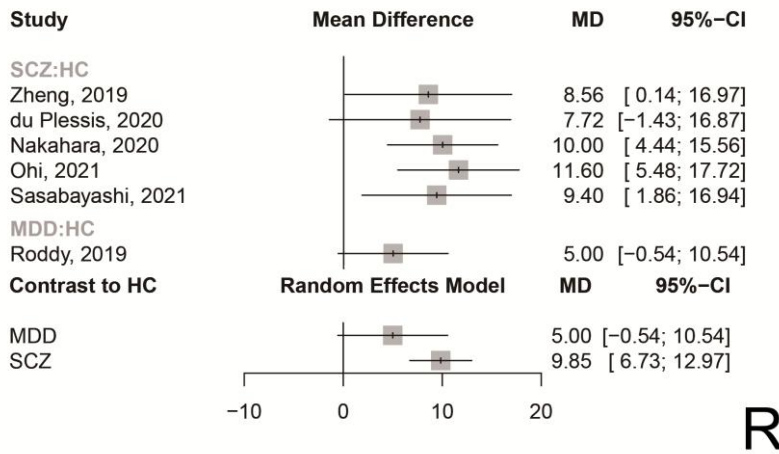

**Fig. S2-11.** Forest plots for the hippocampal fissure. SCZ = schizophrenia; MDD = major depressive disorder; HC = healthy controls; CI = confidence interval; L = left; R = right.

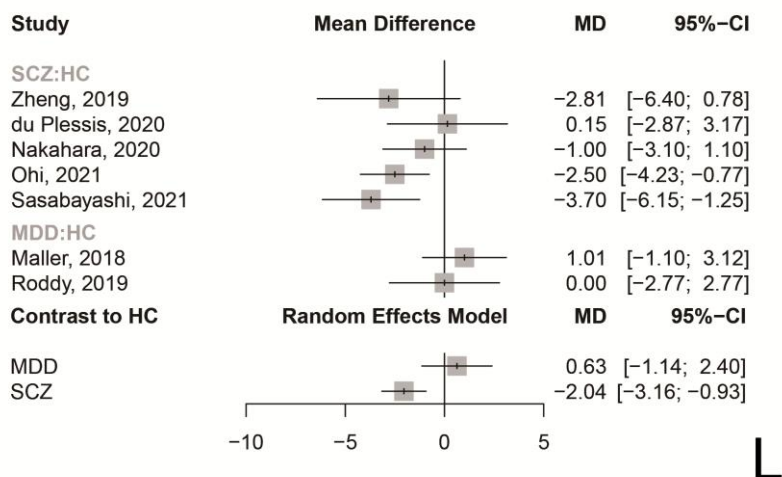

**Fig. S2-12.** Forest plot for the left HATA. SCZ = schizophrenia; MDD = major depressive disorder; HC = healthy controls; HATA = hippocampus–amygdala transition area; CI = confidence interval; L = left.

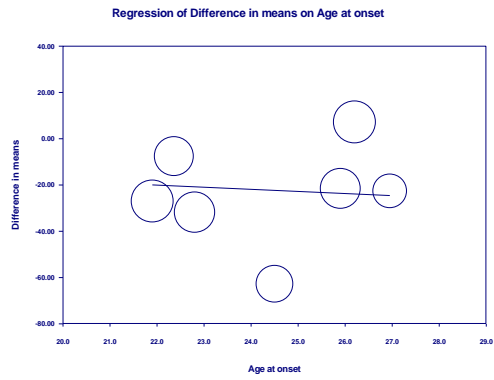

$$(z = -2.65, p_{adjusted} = 0.01)$$

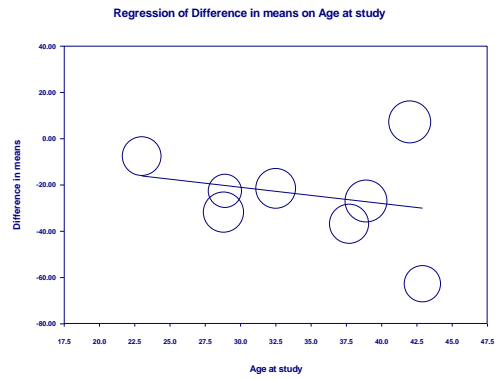

$$(z = -3.25, p_{adjusted} = 0.002)$$

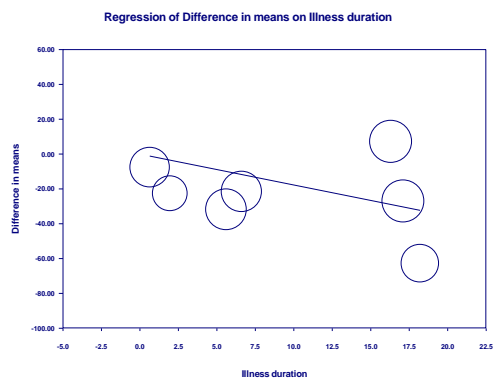

$$(z = -2.33, p_{adjusted} = 0.02)$$

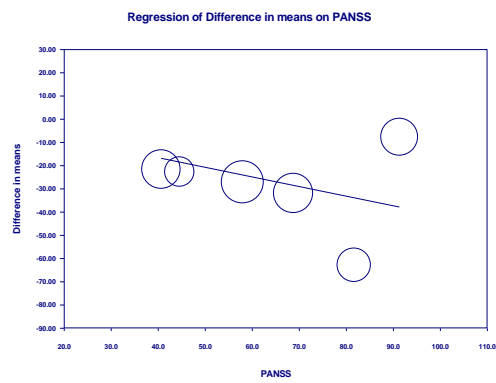

$$(z = -3.94, p_{adjusted} = 0.000)$$

**Fig. S3.** Meta-regression graph: the moderating effect of age at onset, age at study, illness duration and PANSS on the effect size (MD) of left hippocampal tail volume reduction in SCZ versus HC. Each circle represents an individual study, and the size of the circle is proportional to the study weight.



## References

1. Baglivo V, Cao B, Mwangi B, et al. Hippocampal Subfield Volumes in Patients With First-Episode Psychosis. *Schizophrenia bulletin* 2018;44(3):552-9.
2. Briend F, Nelson EA, Maximo O, et al. Hippocampal glutamate and hippocampus subfield volumes in antipsychotic-naïve first episode psychosis subjects and relationships to duration of untreated psychosis. *Translational psychiatry* 2020;10(1):137.
3. Ho NF, Iglesias JE, Sum MY, et al. Progression from selective to general involvement of hippocampal subfields in schizophrenia. *Molecular psychiatry* 2017;22(1):142-52.
4. Xiu MH, Lang X, Chen DC, et al. Cognitive Deficits and Clinical Symptoms with Hippocampal Subfields in First-Episode and Never-Treated Patients with Schizophrenia. *Cerebral cortex (New York, NY : 1991)* 2021;31(1):89-96.
5. Cao B, Passos IC, Mwangi B, et al. Hippocampal subfield volumes in mood disorders. *Molecular psychiatry* 2017;22(9):1352-8.
6. Iglesias JE, Augustinack JC, Nguyen K, et al. A computational atlas of the hippocampal formation using ex vivo, ultra-high resolution MRI: Application to adaptive segmentation of in vivo MRI. *NeuroImage* 2015;115:117-37.
7. Zheng F, Li C, Zhang D, et al. Study on the sub-regions volume of hippocampus and amygdala in schizophrenia. *Quantitative imaging in medicine and surgery* 2019;9(6):1025-36.
8. du Plessis S, Scheffler F, Luckhoff H, et al. Childhood trauma and hippocampal subfield volumes in first-episode schizophrenia and healthy controls. *Schizophrenia research* 2020;215:308-13.
9. Nakahara S, Turner JA, Calhoun VD, et al. Dentate gyrus volume deficit in schizophrenia. *Psychological medicine* 2020;50(8):1267-77.
10. Ohi K, Nemoto K, Kataoka Y, et al. Alterations in hippocampal subfield volumes among schizophrenia patients, their first-degree relatives and healthy subjects. *Progress in neuro-psychopharmacology & biological psychiatry* 2021;110:110291.
11. Sasabayashi D, Yoshimura R, Takahashi T, et al. Reduced Hippocampal Subfield Volume in Schizophrenia and Clinical High-Risk State for Psychosis. *Frontiers in psychiatry* 2021;12:642048.
12. Doolin K, Allers KA, Pleiner S, et al. Altered tryptophan catabolite concentrations in major depressive disorder and associated changes in hippocampal subfield volumes. *Psychoneuroendocrinology* 2018;95:8-17.
13. Maller JJ, Broadhouse K, Rush AJ, et al. Increased hippocampal tail volume predicts depression status and remission to anti-depressant medications in major depression. *Molecular psychiatry* 2018;23(8):1737-44.
14. Na KS, Won E, Kang J, et al. Interaction effects of oxytocin receptor gene polymorphism and depression on hippocampal volume. *Psychiatry research Neuroimaging* 2018;282:18-23.
15. Xu J, Tang Y, Cecilio Baro C, et al. Left fimbria atrophy is associated with hippocampal metabolism in female major depressive disorder patients. *Annual*

*International Conference of the IEEE Engineering in Medicine and Biology Society IEEE Engineering in Medicine and Biology Society Annual International Conference 2018;2018:1136-9.*

16. Han KM, Kim A, Kang W, et al. Hippocampal subfield volumes in major depressive disorder and bipolar disorder. *European psychiatry : the journal of the Association of European Psychiatrists* 2019;57:70-7.
17. Roddy DW, Farrell C, Doolin K, et al. The Hippocampus in Depression: More Than the Sum of Its Parts? Advanced Hippocampal Substructure Segmentation in Depression. *Biological psychiatry* 2019;85(6):487-97.
18. Yuan M, Rubin-Falcone H, Lin X, et al. Smaller left hippocampal subfield CA1 volume is associated with reported childhood physical and/or sexual abuse in major depression: A pilot study. *Journal of affective disorders* 2020;272:348-54.
